# Supplementary material for: Highly Sensitive Graphene-Based Electrochemical Sensor for Nitrite Assay in Waters
Source: MDPI journal article supplement (doi:10.3390/nano13091468), 2023-04-25
Supplement: s1 [file s1]

## Supporting Information

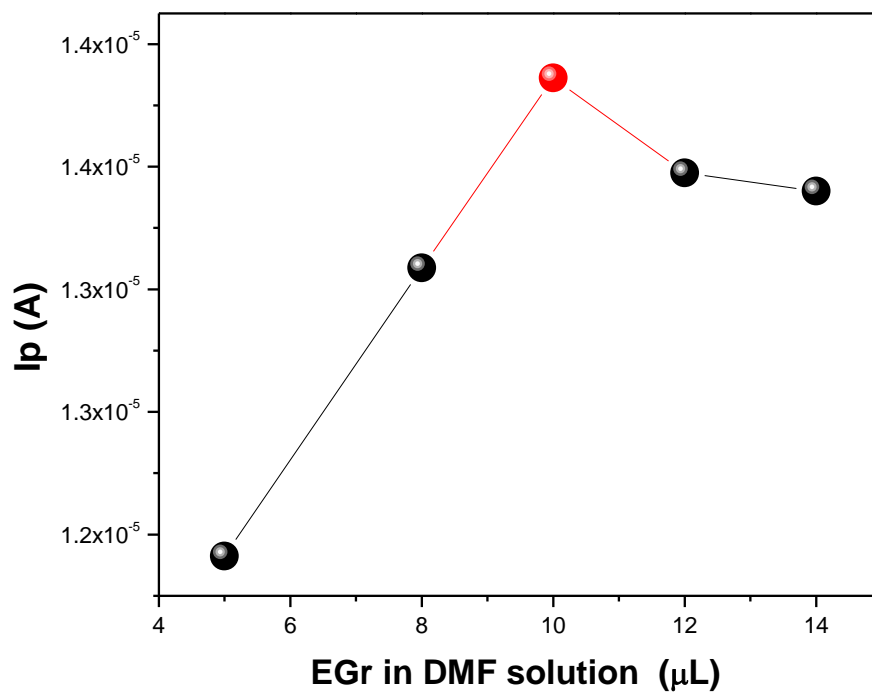

**Figure S1.** Variation of nitrite peak current with the amount of graphene deposited on top of GC electrode ( $10^{-3}$  M  $\text{NaNO}_2$  solution (pH 5.0); 2 mg/mL graphene in DMF)

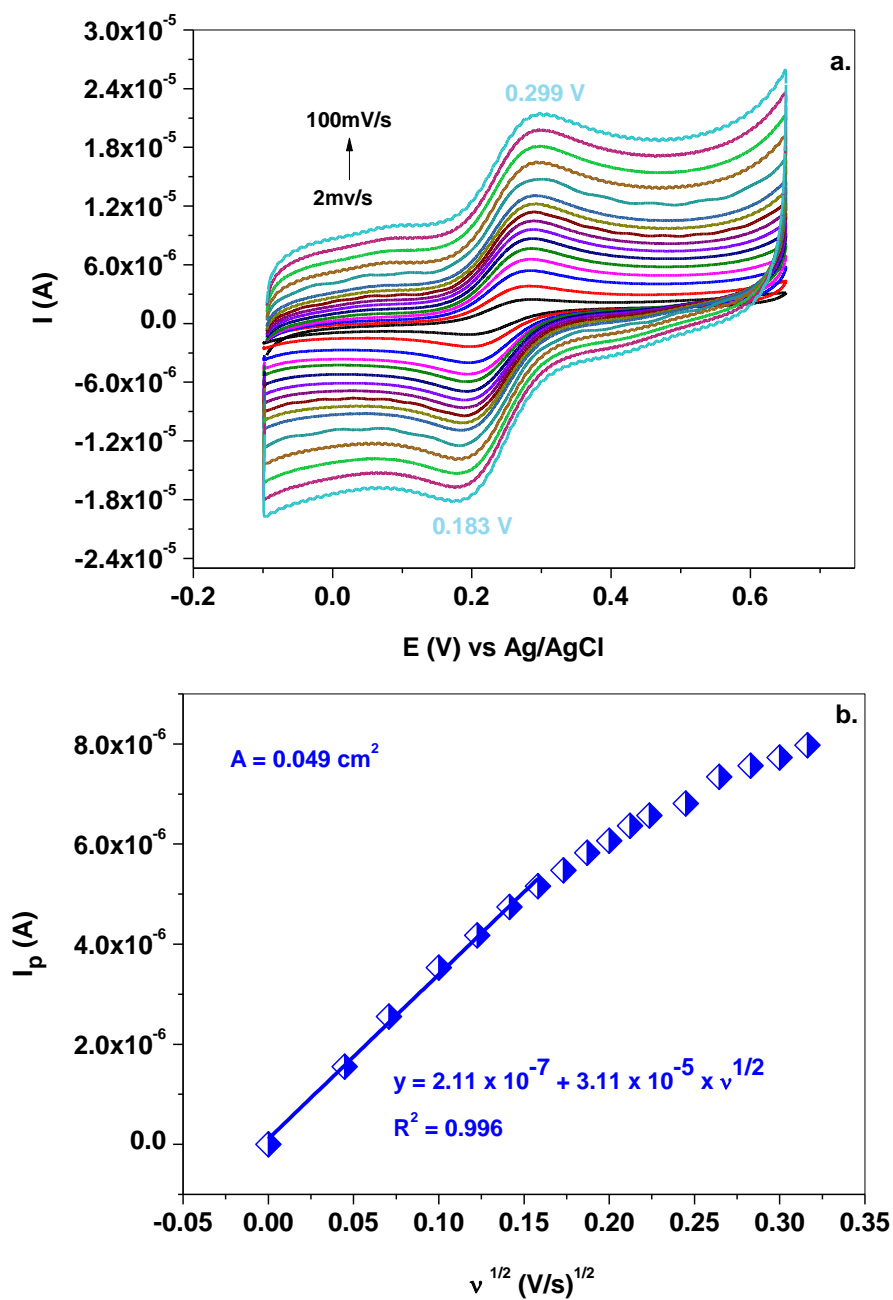

**Figure S2.** Cyclic voltammograms recorded with various scan rates (from 2 to 100 mV/s) in solution containing  $10^{-3}$  M potassium ferrocyanide (0.2 M KCl supporting electrolyte)

(a);

$I_p$  versus  $v^{1/2}$  plot, which allowed the determination of the active area (b)

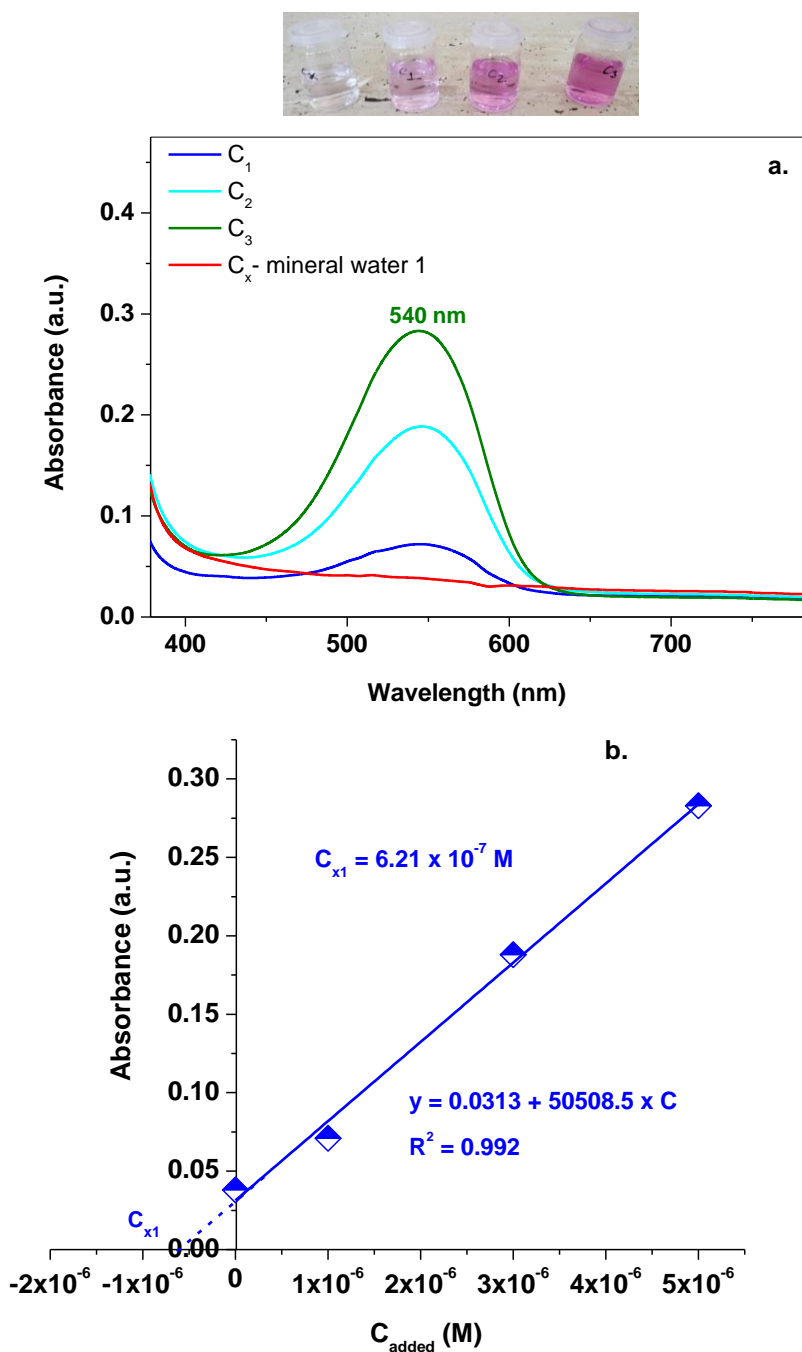

**Figure S3.** UV-Vis spectra recorded in mineral water 1 ( $C_{x1}$ ) and in solutions containing mineral water 1 and the added  $\text{NaNO}_2$  volumes of  $10^{-3} \text{ M}$  stock solution (10; 30 and 50  $\mu\text{L}$  corresponding to  $C_1$ ;  $C_2$  and  $C_3$  concentrations, respectively); one spoon (75 mg) of MQuant® Nitrite Test powder was added in each beaker to color the solutions (a); the standard addition plot which allowed the determination of  $C_{x1}$  (b)

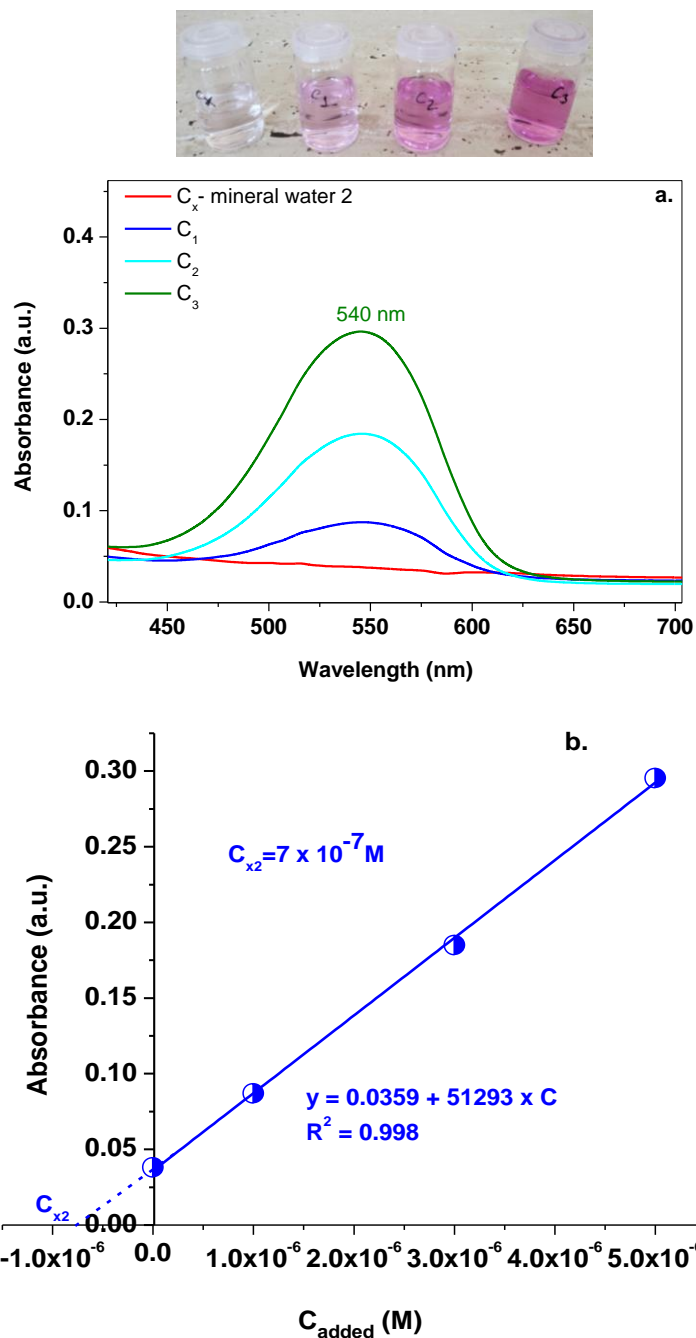

**Figure S4.** UV-Vis spectra recorded in mineral water 2 ( $C_{x2}$ ) and in solutions containing mineral water 2 and the added  $\text{NaNO}_2$  volumes of  $10^{-3}$  M stock solution (10; 30 and 50  $\mu\text{L}$  corresponding to  $C_1$ ;  $C_2$  and  $C_3$  concentrations, respectively); one spoon (75 mg) of MQuant® Nitrite Test powder was added in each beaker to color the solutions (a); the standard addition plot which allowed the determination of  $C_{x2}$  (b)
